# Supplementary material for: Single-Cell RNA Sequencing of Peripheral Blood Reveals That Monocytes With High Cathepsin S Expression Aggravate Cerebral Ischemia-Reperfusion Injury
Source: Research Square preprint supplement (doi:10.21203/rs.3.rs-1157587/v1), 2021-12-16
Supplement: Supplementary file 3 [file 604ae7e176f723fa38e6d3e1.docx]

**Figure** **S1.** Heatmap of the top 10 marker genes from each cluster.

**Figure S2.** Molecular functional analysis of each cell cluster. (A) Functional enrichment analysis for group 3. (B) Functional enrichment analysis for group 4. (C) Functional enrichment analysis for group 2.


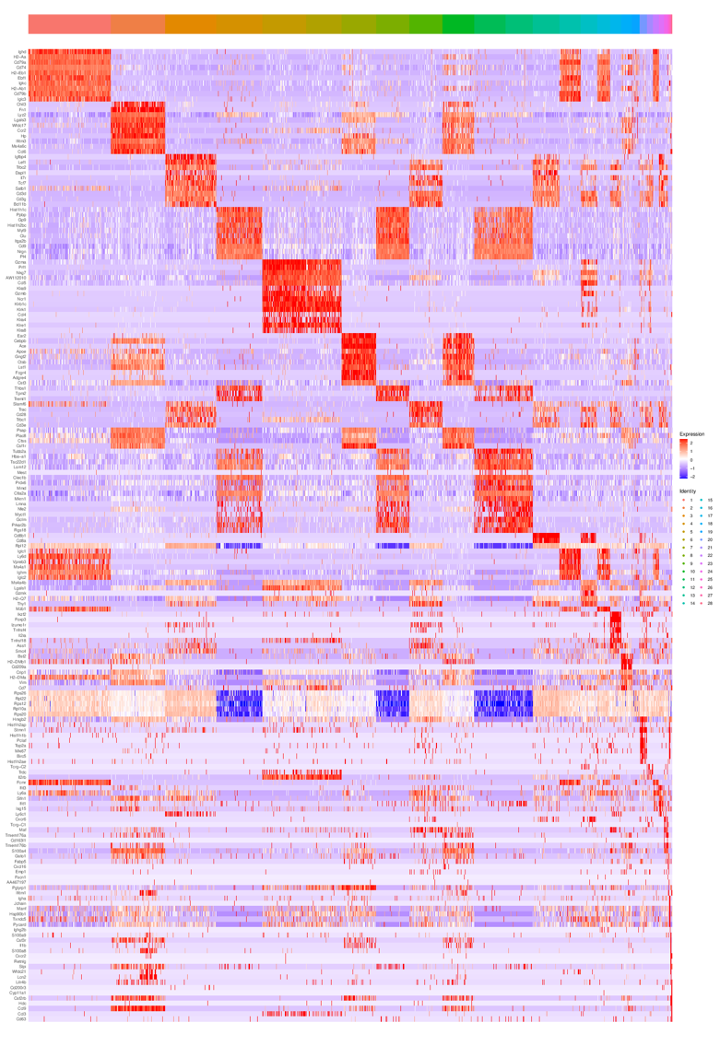


Figure S1.


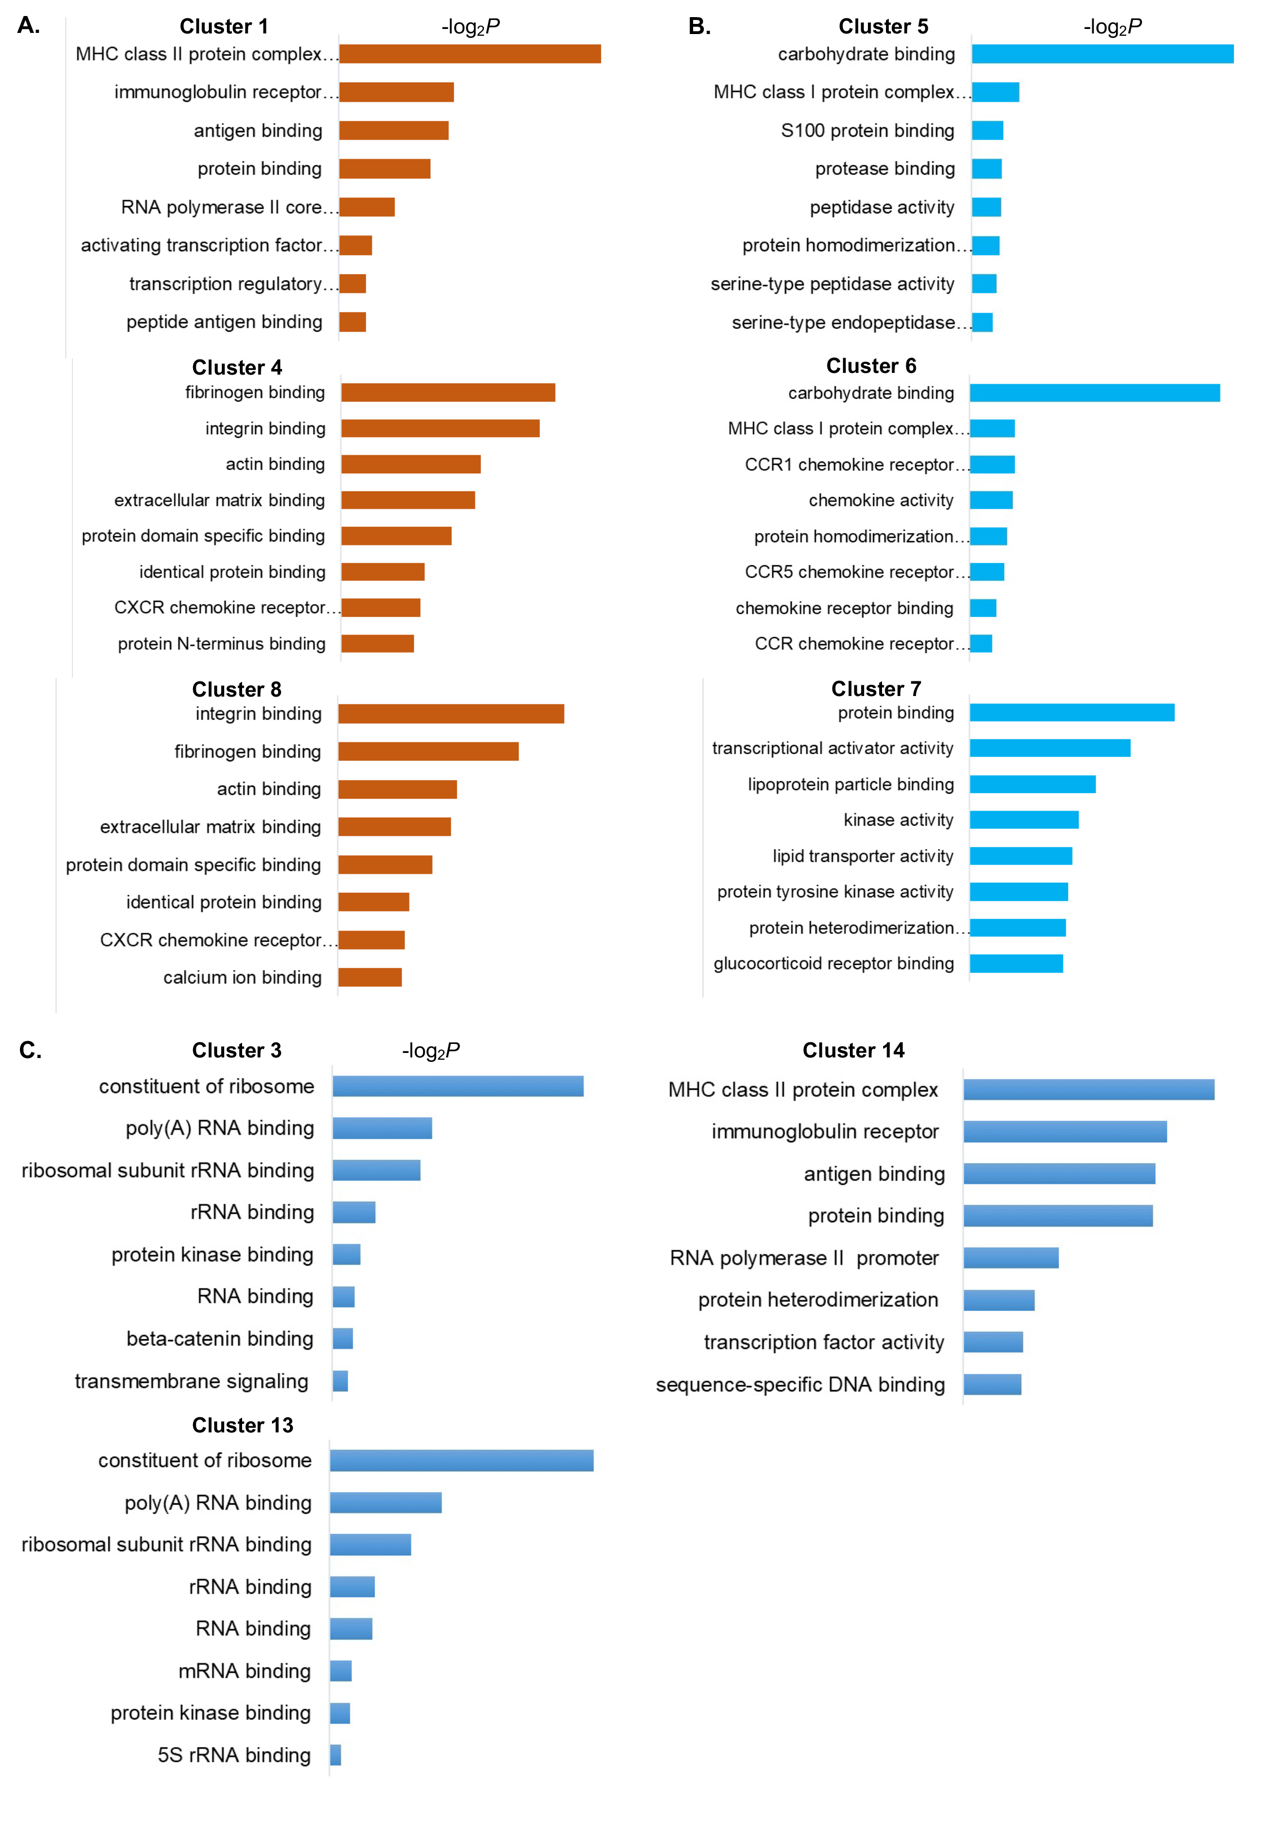


Figure S2.
