# Supplementary material for: Single-Cell RNA Sequencing of Peripheral Blood Reveals That Monocytes With High Cathepsin S Expression Aggravate Cerebral Ischemia-Reperfusion Injury
Source: Research Square preprint supplement (doi:10.21203/rs.3.rs-1157587/v1), 2021-12-16
Supplement: Supplementary file 4 [file 02023988b5cea305973e317a.xlsx]

## Sheet: 文章附表
p_val	avg_logFC	pct.1	pct.2	p_val_adj	cluster	gene
0	2.17771	0.978	0.12	0	1	Ighd
0	2.15215	0.998	0.291	0	1	H2-Aa
0	2.13835	0.995	0.169	0	1	Cd79a
0	2.11423	1	0.497	0	1	Cd74
0	2.11298	0.998	0.243	0	1	H2-Eb1
0	2.02524	0.99	0.1	0	1	Ebf1
0	1.99047	0.978	0.417	0	1	Igkc
0	1.97577	0.997	0.291	0	1	H2-Ab1
0	1.93018	0.995	0.216	0	1	Cd79b
0	1.80377	0.959	0.122	0	1	Iglc3
0	2.93176	0.865	0.171	0	2	Chil3
0	2.71219	0.992	0.113	0	2	Fn1
0	2.40614	1	0.712	0	2	Lyz2
0	2.09295	1	0.276	0	2	Lgals3
0	2.0367	0.998	0.149	0	2	Wfdc17
0	1.99185	0.999	0.251	0	2	Ccr2
0	1.95716	0.998	0.139	0	2	Hp
0	1.83346	1	0.393	0	2	Ifitm3
0	1.83041	0.999	0.236	0	2	Ms4a6c
0	1.81357	0.998	0.178	0	2	Ccl6
0	1.79837	0.81	0.059	0	3	Igfbp4
0	1.56681	0.959	0.196	0	3	Lef1
0	1.40822	0.991	0.307	0	3	Trbc2
0	1.31477	0.53	0.047	0	3	Dapl1
0	1.30975	0.849	0.168	0	3	Il7r
0	1.30054	0.942	0.193	0	3	Tcf7
0	1.26937	0.947	0.331	0	3	Satb1
0	1.26524	0.99	0.23	0	3	Cd3d
0	1.25264	0.989	0.213	0	3	Cd3g
0	1.23068	0.892	0.175	0	3	Bcl11b
0	1.97699	0.901	0.451	0	4	Hist1h1c
0	1.95056	0.994	0.49	0	4	Ppbp
0	1.92836	0.911	0.353	0	4	Gp9
0	1.89874	0.944	0.45	0	4	Hist1h2bc
0	1.86699	0.919	0.407	0	4	Myl9
0	1.82269	0.838	0.34	0	4	Clu
0	1.80975	0.933	0.351	0	4	Itga2b
0	1.80916	0.999	0.775	0	4	Cd9
0	1.79221	0.999	0.698	0	4	Nrgn
0	1.78584	1	0.717	0	4	Pf4
0	2.88207	0.998	0.269	0	5	Gzma
0	2.346	0.986	0.135	0	5	Prf1
0	2.26544	0.997	0.249	0	5	Nkg7
0	2.25044	0.998	0.51	0	5	AW112010
0	2.22577	0.999	0.433	0	5	Ccl5
0	2.053	0.712	0.047	0	5	Klra9
0	2.04305	0.923	0.098	0	5	Gzmb
0	1.97269	0.967	0.081	0	5	Ncr1
0	1.95331	0.973	0.088	0	5	Klrb1c
0	1.92261	0.985	0.14	0	5	Klrk1
0	2.2143	0.433	0.07	0	6	Ccl4
0	1.92391	0.575	0.052	0	6	Klra4
0	1.88337	0.995	0.152	0	6	Klrk1
0	1.88271	0.991	0.28	0	6	Gzma
0	1.82988	1	0.26	0	6	Nkg7
0	1.78932	0.999	0.517	0	6	AW112010
0	1.69962	0.999	0.441	0	6	Ccl5
0	1.68148	0.978	0.117	0	6	Klre1
0	1.67096	0.619	0.065	0	6	Klra8
0	1.66705	0.981	0.1	0	6	Klrb1c
0	2.28091	0.969	0.093	0	7	Ear2
0	2.07917	0.996	0.234	0	7	Cebpb
0	2.06949	0.978	0.104	0	7	Ace
0	2.06927	0.983	0.349	0	7	Apoe
0	2.05011	0.994	0.319	0	7	Gngt2
0	1.99575	0.995	0.397	0	7	Ctsb
0	1.88515	0.995	0.266	0	7	Lst1
0	1.85923	0.931	0.084	0	7	Fcgr4
0	1.79711	0.949	0.097	0	7	Adgre4
0	1.74164	0.999	0.651	0	7	Cst3
0	2.06402	1	0.5	0	8	Ppbp
0	1.91814	0.979	0.456	0	8	Hist1h1c
0	1.85445	0.97	0.292	0	8	Thbs1
0	1.82997	0.972	0.361	0	8	Gp9
0	1.8183	0.719	0.103	0	8	Tpm2
0	1.79866	1	0.723	0	8	Pf4
0	1.79144	0.985	0.361	0	8	Itga2b
0	1.76787	0.986	0.458	0	8	Hist1h2bc
0	1.74793	0.913	0.245	0	8	Treml1
0	1.73298	0.973	0.415	0	8	Myl9
0	1.4614	0.909	0.282	0	9	Slamf6
0	1.44974	0.993	0.327	0	9	Trbc2
0	1.38932	0.971	0.221	0	9	Trac
0	1.36092	0.992	0.236	0	9	Cd3g
0	1.35942	0.992	0.252	0	9	Cd3d
0	1.28056	0.91	0.185	0	9	Cd28
0	1.27191	0.922	0.216	0	9	Tcf7
0	1.2563	0.643	0.274	0	9	Trbc1
0	1.24027	0.742	0.194	0	9	Il7r
0	1.21289	0.979	0.225	0	9	Cd3e
0	1.86193	0.946	0.354	0	10	Apoe
0	1.70963	1	0.639	0	10	Psap
0	1.64639	0.986	0.322	0	10	Gngt2
0	1.57721	0.984	0.238	0	10	Cebpb
0	1.55398	0.991	0.479	0	10	Plac8
0	1.54294	0.999	0.566	0	10	Ctss
0	1.53425	1	0.653	0	10	Cst3
0	1.53422	0.996	0.199	0	10	Csf1r
0	1.52242	0.999	0.416	0	10	Ifitm3
0	1.46973	0.997	0.4	0	10	Ctsb
0	2.31185	0.844	0.264	0	11	Tubb2a
0	2.25207	0.835	0.594	0	11	Hba-a1
0	2.18211	0.996	0.575	0	11	Tsc22d1
0	2.09899	0.987	0.671	0	11	Lsm12
0	2.0787	0.259	0.02	0	11	Mest
0	1.93273	0.983	0.402	0	11	Clec1b
0	1.91879	0.8	0.597	0	11	Prdx6
0	1.8306	0.707	0.279	0	11	Mmd
0	1.8278	1	0.891	0	11	Ctla2a
0	1.79829	0.906	0.64	0	11	Mkrn1
0	2.1303	0.979	0.262	0	12	Tubb2a
0	1.98503	0.862	0.13	0	12	Lmna
0	1.92416	0.821	0.209	0	12	Nfe2
0	1.84819	0.998	0.405	0	12	Clec1b
0	1.84361	0.772	0.079	0	12	Myct1
0	1.83146	0.94	0.293	0	12	Gclm
0	1.82664	0.96	0.242	0	12	Prkar2b
0	1.79382	0.999	0.577	0	12	Tsc22d1
0	1.78522	0.917	0.276	0	12	Rgs18
0	1.78343	0.939	0.299	0	12	Thbs1
0	2.09961	0.985	0.06	0	13	Cd8b1
0	1.43391	0.939	0.041	0	13	Cd8a
0	1.39623	0.586	0.064	0	13	Dapl1
0	1.23636	0.916	0.192	0	13	Il7r
0	1.21251	0.996	0.26	0	13	Cd3d
0	1.03606	0.993	0.334	0	13	Trbc2
0	1.02957	0.938	0.227	0	13	Lef1
0	1.0211	0.995	0.244	0	13	Cd3g
0	0.991884	0.988	0.232	0	13	Cd3e
0	0.954172	0.999	0.824	0	13	Rpl12
0	2.26603	0.864	0.166	0	14	Iglc1
0	2.23725	0.98	0.217	0	14	Ly6d
0	2.02976	0.817	0.102	0	14	Vpreb3
0	1.99557	0.951	0.185	0	14	Ms4a1
0	1.98812	0.996	0.575	0	14	Ighm
0	1.91443	0.992	0.292	0	14	Cd79b
0	1.86861	0.996	0.25	0	14	Cd79a
0	1.8306	0.904	0.235	0	14	Iglc2
0	1.80768	0.985	0.187	0	14	Ebf1
0	1.74404	0.958	0.472	0	14	Igkc
0	2.39095	0.997	0.458	0	15	Ccl5
0	2.14186	0.852	0.078	0	15	Cd8b1
0	1.47031	0.836	0.058	0	15	Cd8a
0	1.46548	0.999	0.282	0	15	Nkg7
0	1.33698	0.998	0.496	0	15	Ms4a4b
0	1.30737	0.982	0.495	0	15	Lgals1
0	1.2931	0.968	0.245	0	15	Cd3e
0	1.26002	0.585	0.015	0	15	Gzmk
0	1.256	0.998	0.621	0	15	H2-Q7
0	1.2451	0.937	0.235	0	15	Thy1
0	1.81944	0.98	0.243	0	16	Iglc2
0	1.7373	0.923	0.175	0	16	Iglc1
0	1.72331	0.922	0.583	0	16	Ighm
0	1.62695	0.99	0.163	0	16	Mzb1
0	1.59763	0.997	0.194	0	16	Ms4a1
0	1.52814	0.983	0.213	0	16	Iglc3
0	1.49914	0.997	0.26	0	16	Cd79a
0	1.48965	0.999	0.302	0	16	Cd79b
0	1.41414	0.994	0.227	0	16	Ly6d
0	1.3904	0.953	0.479	0	16	Igkc
0	2.20531	0.839	0.065	0	17	Ikzf2
0	1.51303	0.754	0.006	0	17	Foxp3
0	1.39696	0.989	0.35	0	17	Trbc2
0	1.39068	0.737	0.076	0	17	Izumo1r
0	1.31659	0.674	0.023	0	17	Tnfrsf4
0	1.23789	0.604	0.01	0	17	Il2ra
0	1.20009	0.787	0.177	0	17	Tnfrsf18
2.27517229909894e-320	1.13016	0.689	0.185	4.85681030688651e-316	17	Ass1
1.9719e-282	1.12098	0.881	0.374	4.20942e-278	17	Smc4
8.84584e-109	1.1442	0.649	0.286	1.88832e-104	17	Trbc1
0	1.81982	0.959	0.377	0	18	Bst2
0	1.76011	0.962	0.192	0	18	H2-DMb1
0	1.75919	0.734	0.007	0	18	Cd209a
0	1.35506	0.995	0.665	0	18	Cst3
0	1.34249	0.997	0.76	0	18	Crip1
0	1.27123	0.995	0.408	0	18	H2-DMa
5.5372259037964e-318	1.39906	0.974	0.599	1.18203161368342e-313	18	Vim
1.11683e-264	1.37854	0.692	0.174	2.38411e-260	18	Cd7
1.49497e-185	1.50155	0.865	0.373	3.19131e-181	18	H2-Ab1
1.09374e-162	1.35702	0.842	0.373	2.3348e-158	18	H2-Aa
1.91099e-148	0.763601	0.381	0.438	4.07938e-144	19	Pold4
6.69947e-132	0.796461	0.909	0.832	1.43014e-127	19	Rps26
3.89144e-53	0.832573	0.273	0.179	8.30705e-49	19	Mzb1
1.73382e-49	0.866281	0.622	0.503	3.70118e-45	19	Plac8
3.18629e-47	0.835957	0.52	0.682	6.80178e-43	19	Hbb-bs
2.3447e-42	1.00637	0.057	0.067	5.00523e-38	19	Fabp4
3.34495e-33	0.84819	0.402	0.256	7.14046e-29	19	Iglc2
1.82702e-27	1.43149	0.298	0.188	3.90014e-23	19	Iglc1
4.31e-07	0.918995	0.017	0.045	0.00920056	19	S100a9
7.78203e-06	1.08345	0.03	0.008	0.166123	19	Ighg2b
0	2.35588	1	0.616	0	20	Hmgb2
0	2.25311	0.51	0.076	0	20	Hist1h2ap
0	2.24574	0.966	0.104	0	20	Stmn1
0	1.87827	0.488	0.026	0	20	Hist1h1b
0	1.87344	0.782	0.015	0	20	Pclaf
0	1.69504	0.71	0.04	0	20	Top2a
0	1.51302	0.793	0.03	0	20	Mki67
4.67119e-230	1.55356	0.966	0.502	9.97158e-226	20	Lgals1
3.64568e-13	1.81948	0.022	0.004	7.78244e-09	20	Camp
1.38416e-09	1.54734	0.108	0.044	2.95476e-05	20	S100a9
6.7482e-272	1.06168	0.532	0.009	1.44054e-267	21	Tcrg-C2
1.25587e-225	1.18425	0.989	0.283	2.68091e-221	21	Cd3d
1.54732e-207	1.42295	0.71	0.072	3.30306e-203	21	Ikzf2
7.22245e-204	1.11547	0.989	0.268	1.54178e-199	21	Cd3g
6.02689e-193	1.02094	0.975	0.256	1.28656e-188	21	Cd3e
2.24077e-191	1.03052	0.989	0.504	4.78337e-187	21	Ms4a4b
7.63513e-180	1.76361	0.395	0.052	1.62987e-175	21	Trdc
1.81875e-168	0.98269	0.915	0.25	3.88249e-164	21	Il2rb
3.57786e-164	1.24376	0.814	0.177	7.63765e-160	21	Cd7
2.61725e-132	1.03239	0.825	0.217	5.58705e-128	21	Il7r
0	1.4908	0.997	0.268	0	22	Cd79a
0	1.45852	1	0.375	0	22	H2-Aa
0	1.45731	1	0.557	0	22	Cd74
1.13141032897645e-321	1.46253	0.997	0.333	2.41522162926604e-317	22	H2-Eb1
4.38098238488322e-314	1.37097	1	0.375	9.35208309701022e-310	22	H2-Ab1
1.79751e-277	1.44119	0.975	0.484	3.83715e-273	22	Igkc
9.03639e-275	1.53907	0.989	0.222	1.929e-270	22	Ighd
3.14204e-233	1.35399	0.964	0.202	6.70732e-229	22	Fcmr
3.88204e-199	1.49417	0.615	0.112	8.28699e-195	22	Ifit3
2.41455e-192	1.40688	0.932	0.398	5.15435e-188	22	Ly6a
7.9625e-185	1.32275	0.966	0.251	1.69976e-180	23	Lef1
9.9337e-169	1.32456	0.997	0.357	2.12055e-164	23	Trbc2
7.15293e-164	1.21495	0.938	0.339	1.52694e-159	23	Slfn1
7.03193e-160	1.28054	0.781	0.116	1.50111e-155	23	Ifit1
1.26542e-153	1.33829	0.777	0.114	2.7013e-149	23	Igfbp4
3.20027e-149	1.1104	0.945	0.247	6.83163e-145	23	Tcf7
3.12627e-145	1.25695	0.682	0.113	6.67365e-141	23	Ifit3
3.38312e-141	1.31607	0.75	0.19	7.22195e-137	23	Isg15
1.81143e-121	1.15097	0.545	0.053	3.86687e-117	23	Ly6c1
4.99907e-60	1.22579	0.682	0.29	1.06715e-55	23	Trbc1
0	1.92665	0.826	0.041	0	24	Cxcr6
3.2906e-298	1.88425	0.652	0.007	7.02444e-294	24	Tcrg-C1
9.36527e-230	1.67817	0.923	0.156	1.9992e-225	24	Maf
5.6612e-219	1.68229	0.83	0.094	1.2085e-214	24	Tmem176a
4.08684e-194	1.58636	0.368	0.003	8.72418e-190	24	Cd163l1
2.611e-193	2.05854	0.526	0.053	5.5737e-189	24	Trdc
6.98563e-182	1.59763	0.834	0.123	1.49122e-177	24	Tmem176b
7.76159e-159	1.75858	0.968	0.34	1.65687e-154	24	S100a4
1.53403e-152	1.60629	0.972	0.504	3.27469e-148	24	Lgals1
2.94886e-143	1.55056	0.931	0.218	6.29492e-139	24	Il7r
9.81871e-228	4.25336	0.72	0.214	2.096e-223	25	Gsto1
2.91874e-222	2.85814	0.6	0.086	6.23063e-218	25	Fabp5
8.49295e-98	3.07643	0.173	0.004	1.81299e-93	25	Plet1
6.84031e-78	2.67753	0.173	0.004	1.4602e-73	25	Prss27
5.35906e-75	3.30909	0.227	0.007	1.144e-70	25	Asprv1
2.37595e-64	2.97097	0.187	0.005	5.07195e-60	25	Psca
9.42498e-52	2.80121	0.173	0.002	2.01195e-47	25	Csta1
4.07918e-51	3.00927	0.173	0.002	8.70783e-47	25	BC100530
1.0906e-49	2.67873	0.213	0.002	2.32811e-45	25	Mal
5.72798e-45	2.73788	0.387	0.055	1.22275e-40	25	Ifitm1
0	5.89091	0.959	0.119	0	26	Igha
0	5.13181	1	0.02	0	26	Jchain
1.77048424187211e-319	2.31546	1	0.411	3.77945271112439e-315	26	Manf
9.52753e-304	2.68163	1	0.565	2.03384e-299	26	Hsp90b1
1.92898e-214	2.32948	1	0.566	4.1178e-210	26	Pycard
3.50968e-204	3.04667	1	0.178	7.49212e-200	26	Mzb1
4.8915e-125	4.22862	1	0.487	1.04419e-120	26	Igkc
1.81009e-37	3.28818	0.781	0.188	3.864e-33	26	Iglc1
3.01493e-28	2.68994	0.26	0.007	6.43598e-24	26	Ighg2b
9.59116e-23	2.66777	0.123	0.003	2.04742e-18	26	Ighg2c
0	6.3068	1	0.043	0	27	S100a9
0	3.1235	0.926	0.128	0	27	Csf3r
6.00746e-239	3.42574	0.853	0.053	1.28241e-234	27	Il1b
5.63734e-238	5.76824	1	0.066	1.2034e-233	27	S100a8
3.95206e-194	2.9453	0.956	0.006	8.43647e-190	27	Cxcr2
2.33888e-171	4.23133	0.926	0.002	4.99281e-167	27	Retnlg
1.67057e-135	3.07632	0.985	0.141	3.56617e-131	27	Slpi
8.05024e-75	3.25844	0.706	0.041	1.71849e-70	27	Lcn2
1.34355e-34	3.50279	0.147	0.004	2.86808e-30	27	Ngp
1.07378e-24	3.30539	0.103	0.004	2.29219e-20	27	Camp
2.52957e-196	2.41286	1	0.059	5.39988e-192	28	Lilr4b
1.38085e-159	2.3865	0.974	0.008	2.9477e-155	28	Cd200r3
2.2133e-141	2.59385	0.974	0.002	4.72474e-137	28	Cyp11a1
3.5145e-139	4.23562	1	0.054	7.50241e-135	28	Ifitm1
5.63705e-128	2.38802	1	0.174	1.20334e-123	28	Csf2rb
1.33802e-114	3.60679	1	0.246	2.85626e-110	28	Ccl6
1.18286e-107	2.83225	1	0.007	2.52506e-103	28	Hdc
9.15956e-107	2.95506	0.974	0.188	1.95529e-102	28	Ccl9
1.02522e-87	2.83119	0.974	0.049	2.18853e-83	28	Ccl3
1.61123e-72	2.7375	1	0.031	3.43949e-68	28	Cd63
