# Supplementary material for: Single-Cell RNA Sequencing of Peripheral Blood Reveals That Monocytes With High Cathepsin S Expression Aggravate Cerebral Ischemia-Reperfusion Injury
Source: Research Square preprint supplement (doi:10.21203/rs.3.rs-1157587/v1), 2021-12-16
Supplement: Supplementary file 5 [file 12231478c9e09689cb677756.docx]

**Table S1:** List of the top 10 marker genes from each cluster.
